# Supplementary material for: Nephrology In-Reach Services Lead to Improvement in Mortality in Acute Kidney Injury – 3 (AKI-3)
Source: Research Square preprint supplement (doi:10.21203/rs.3.rs-119034/v1), 2020-12-03
Supplement: Supplementary file 1 [file 8ae91efe056617e1f71ec07c.docx]

**Appendix 1: Regional and national public health profiles**

|  | South Tyneside | General population (UK) |
| --- | --- | --- |
| Population | 150,300 | 64,553,900 |
| Life expectancy | 77.7 years (male)  81.7 years (female) | 79.6 years (male)  83.1 years (female) |
| Smoking prevalence (18+) | 18.8% | 14.4% |
| Overweight or obese (18+) | 71.7% | 66.5% |
